# Supplementary figures and images for: Wings and halteres act as coupled dual oscillators in flies
Source: eLife journal article supplement (doi:10.7554/elife.53824), 2021-11-12

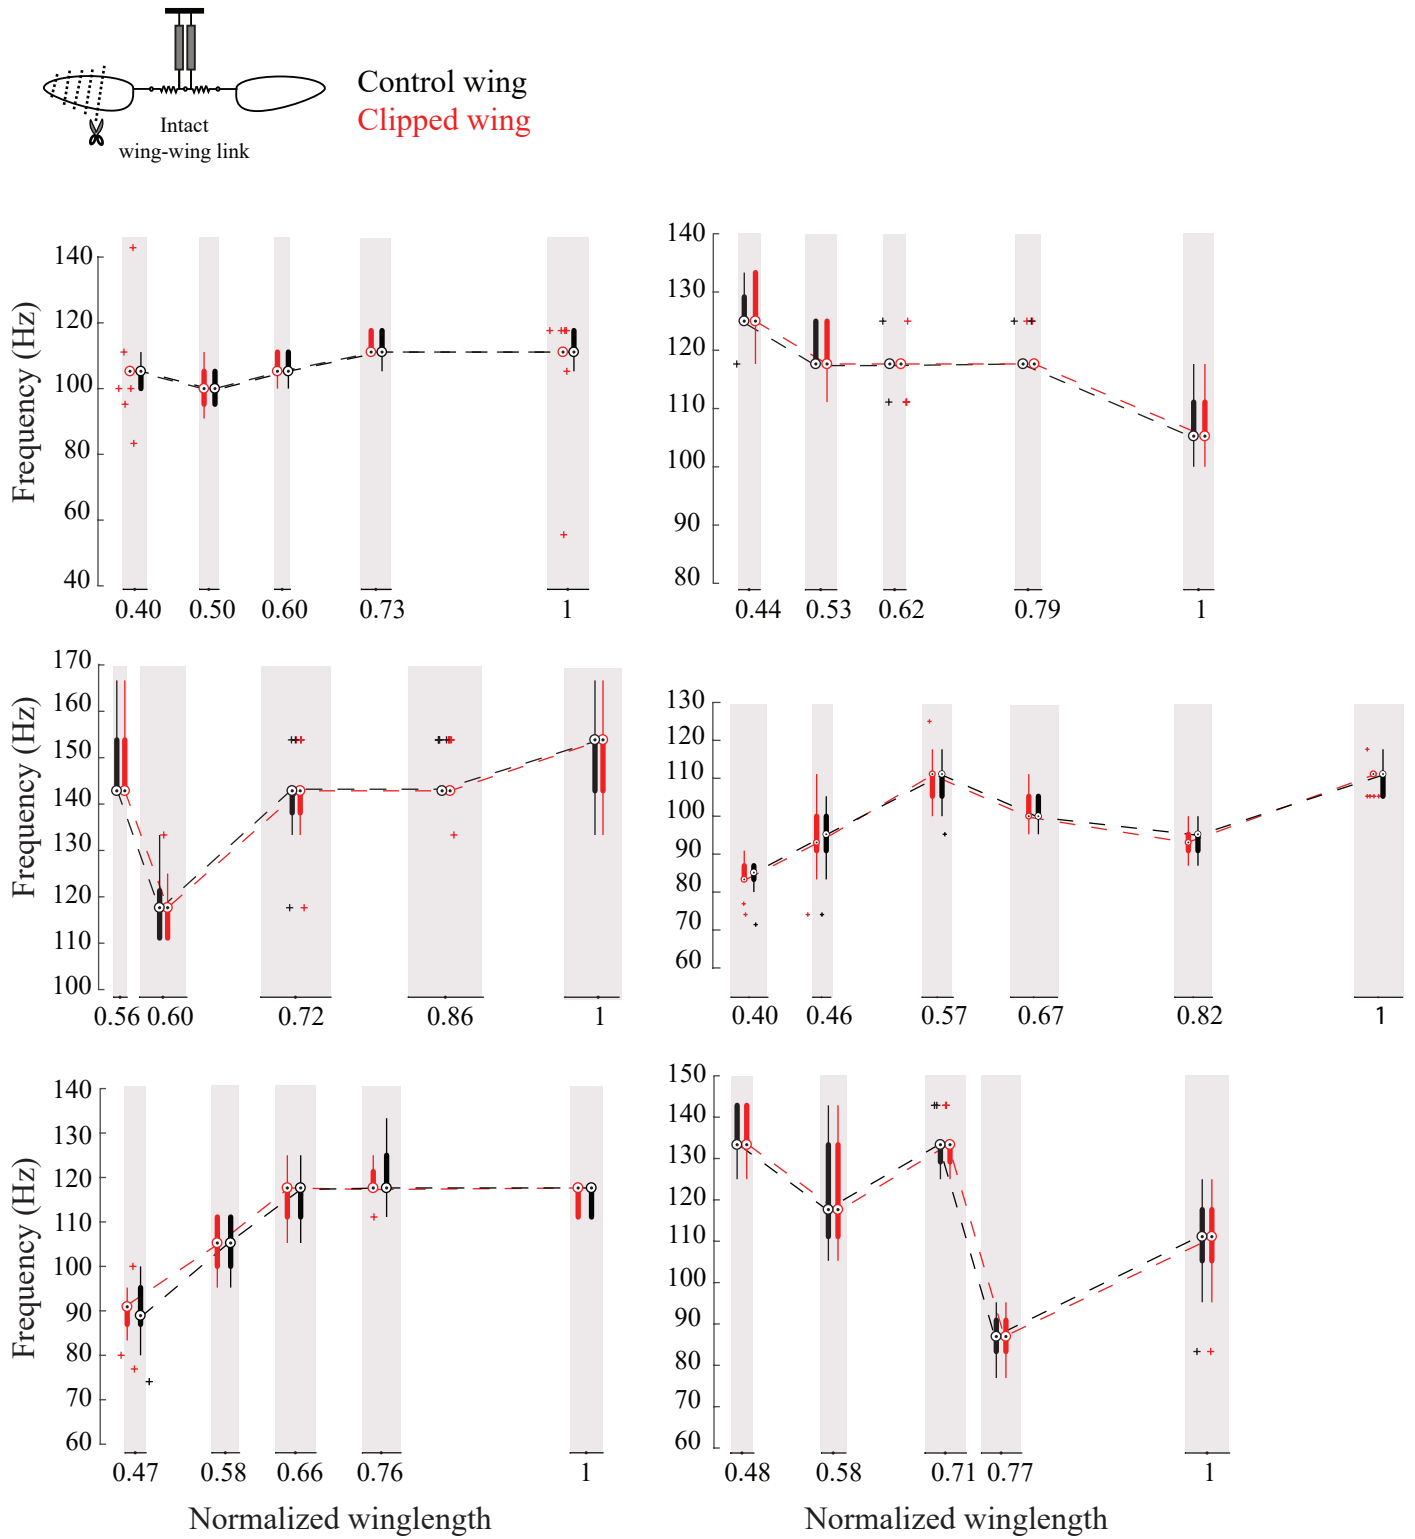

Supplement: supp [file elife-53824-supp-v1.zip]

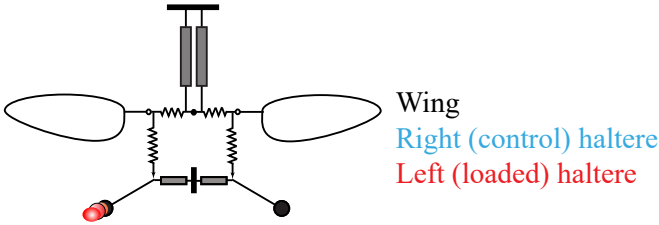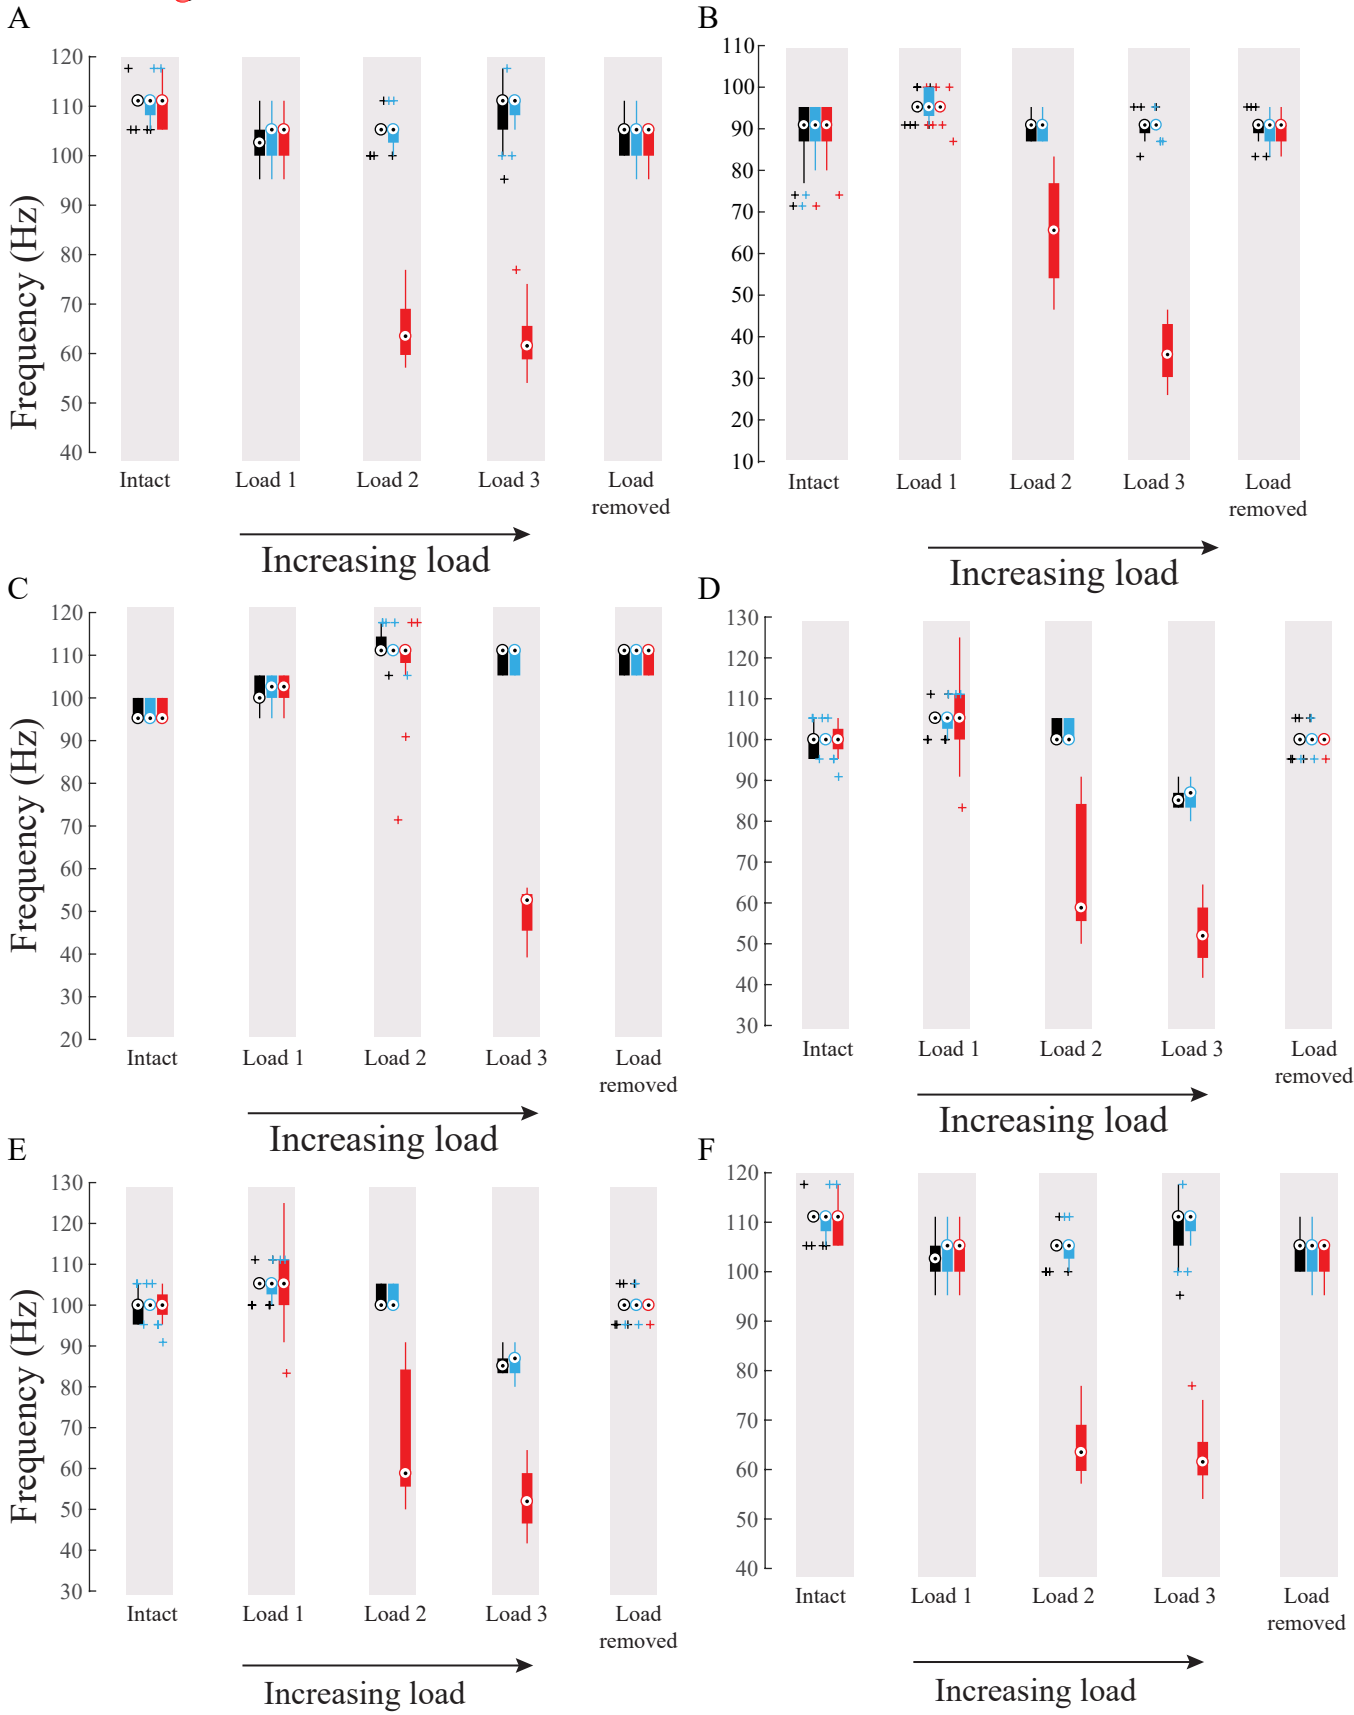

Supplement: supp [file elife-53824-supp-v1.zip]

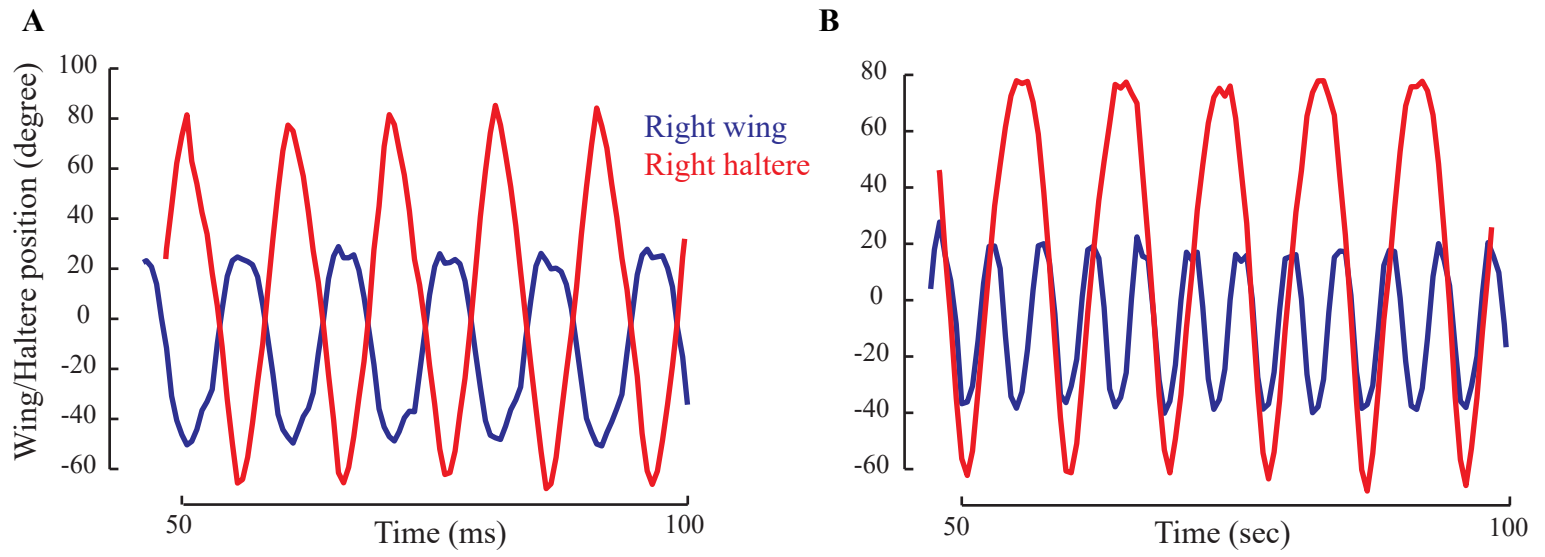

Supplement: supp [file elife-53824-supp-v1.zip]

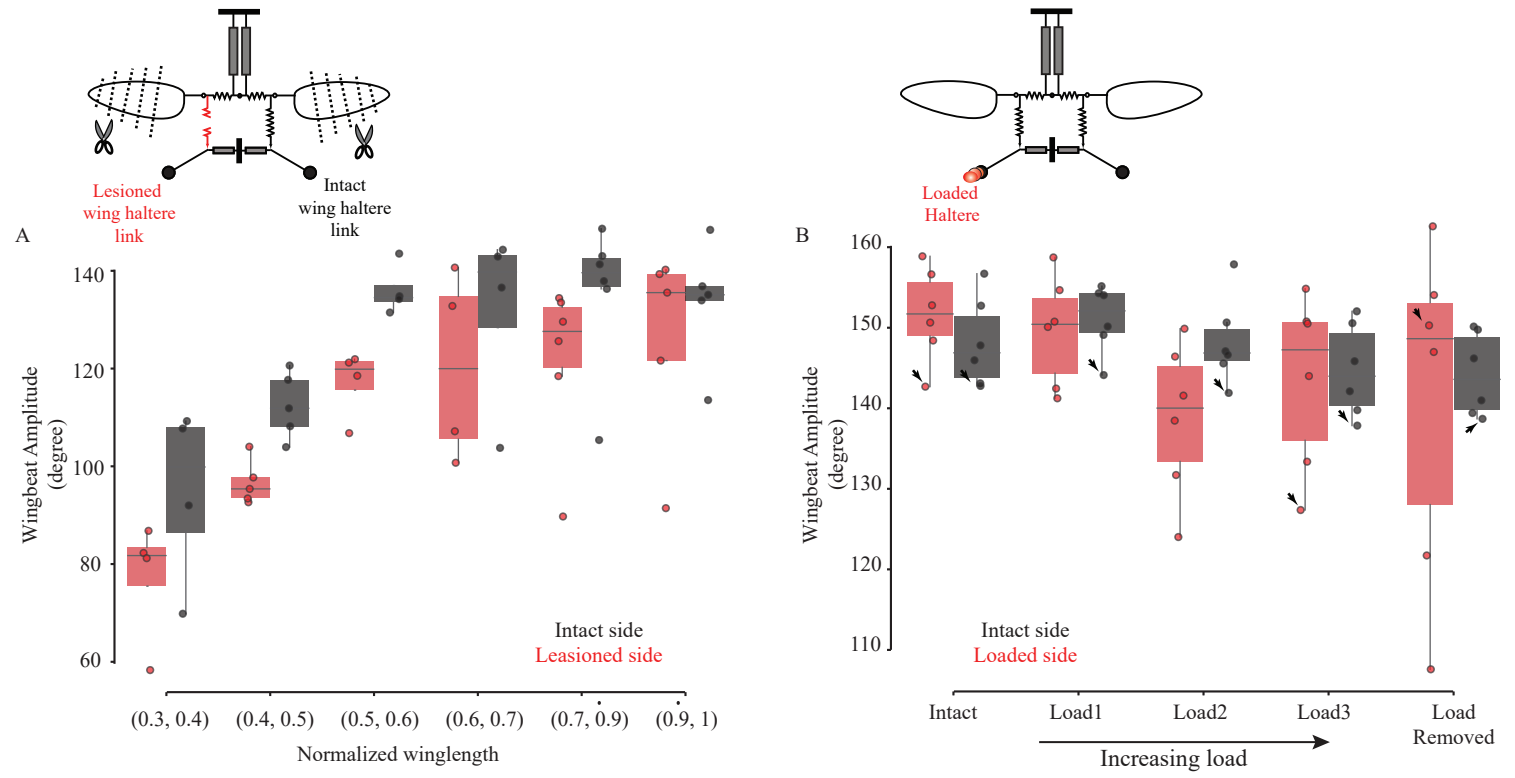

Supplement: supp [file elife-53824-supp-v1.zip]

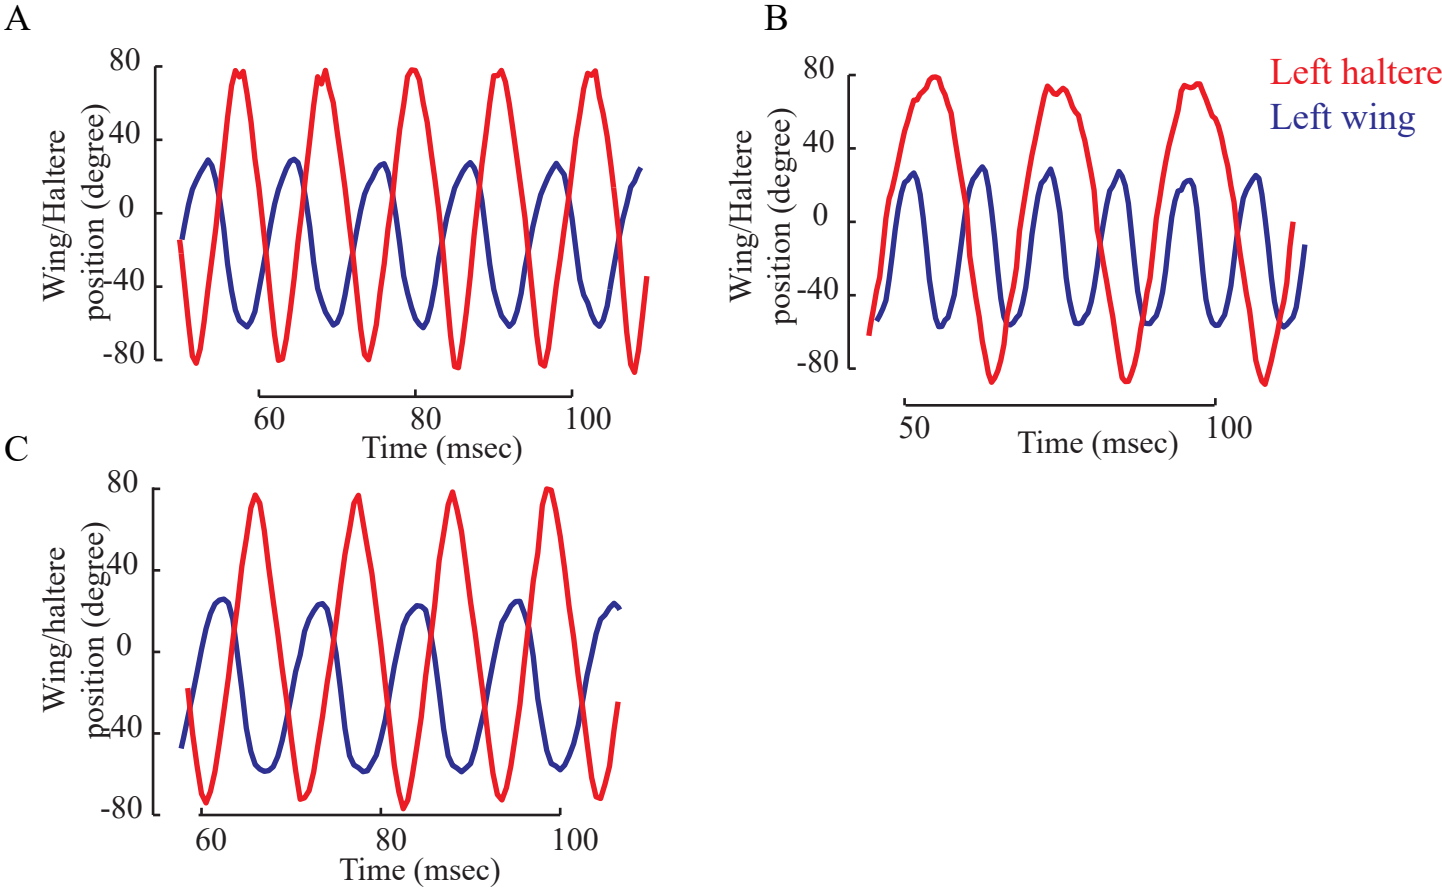

Supplement: supp [file elife-53824-supp-v1.zip]

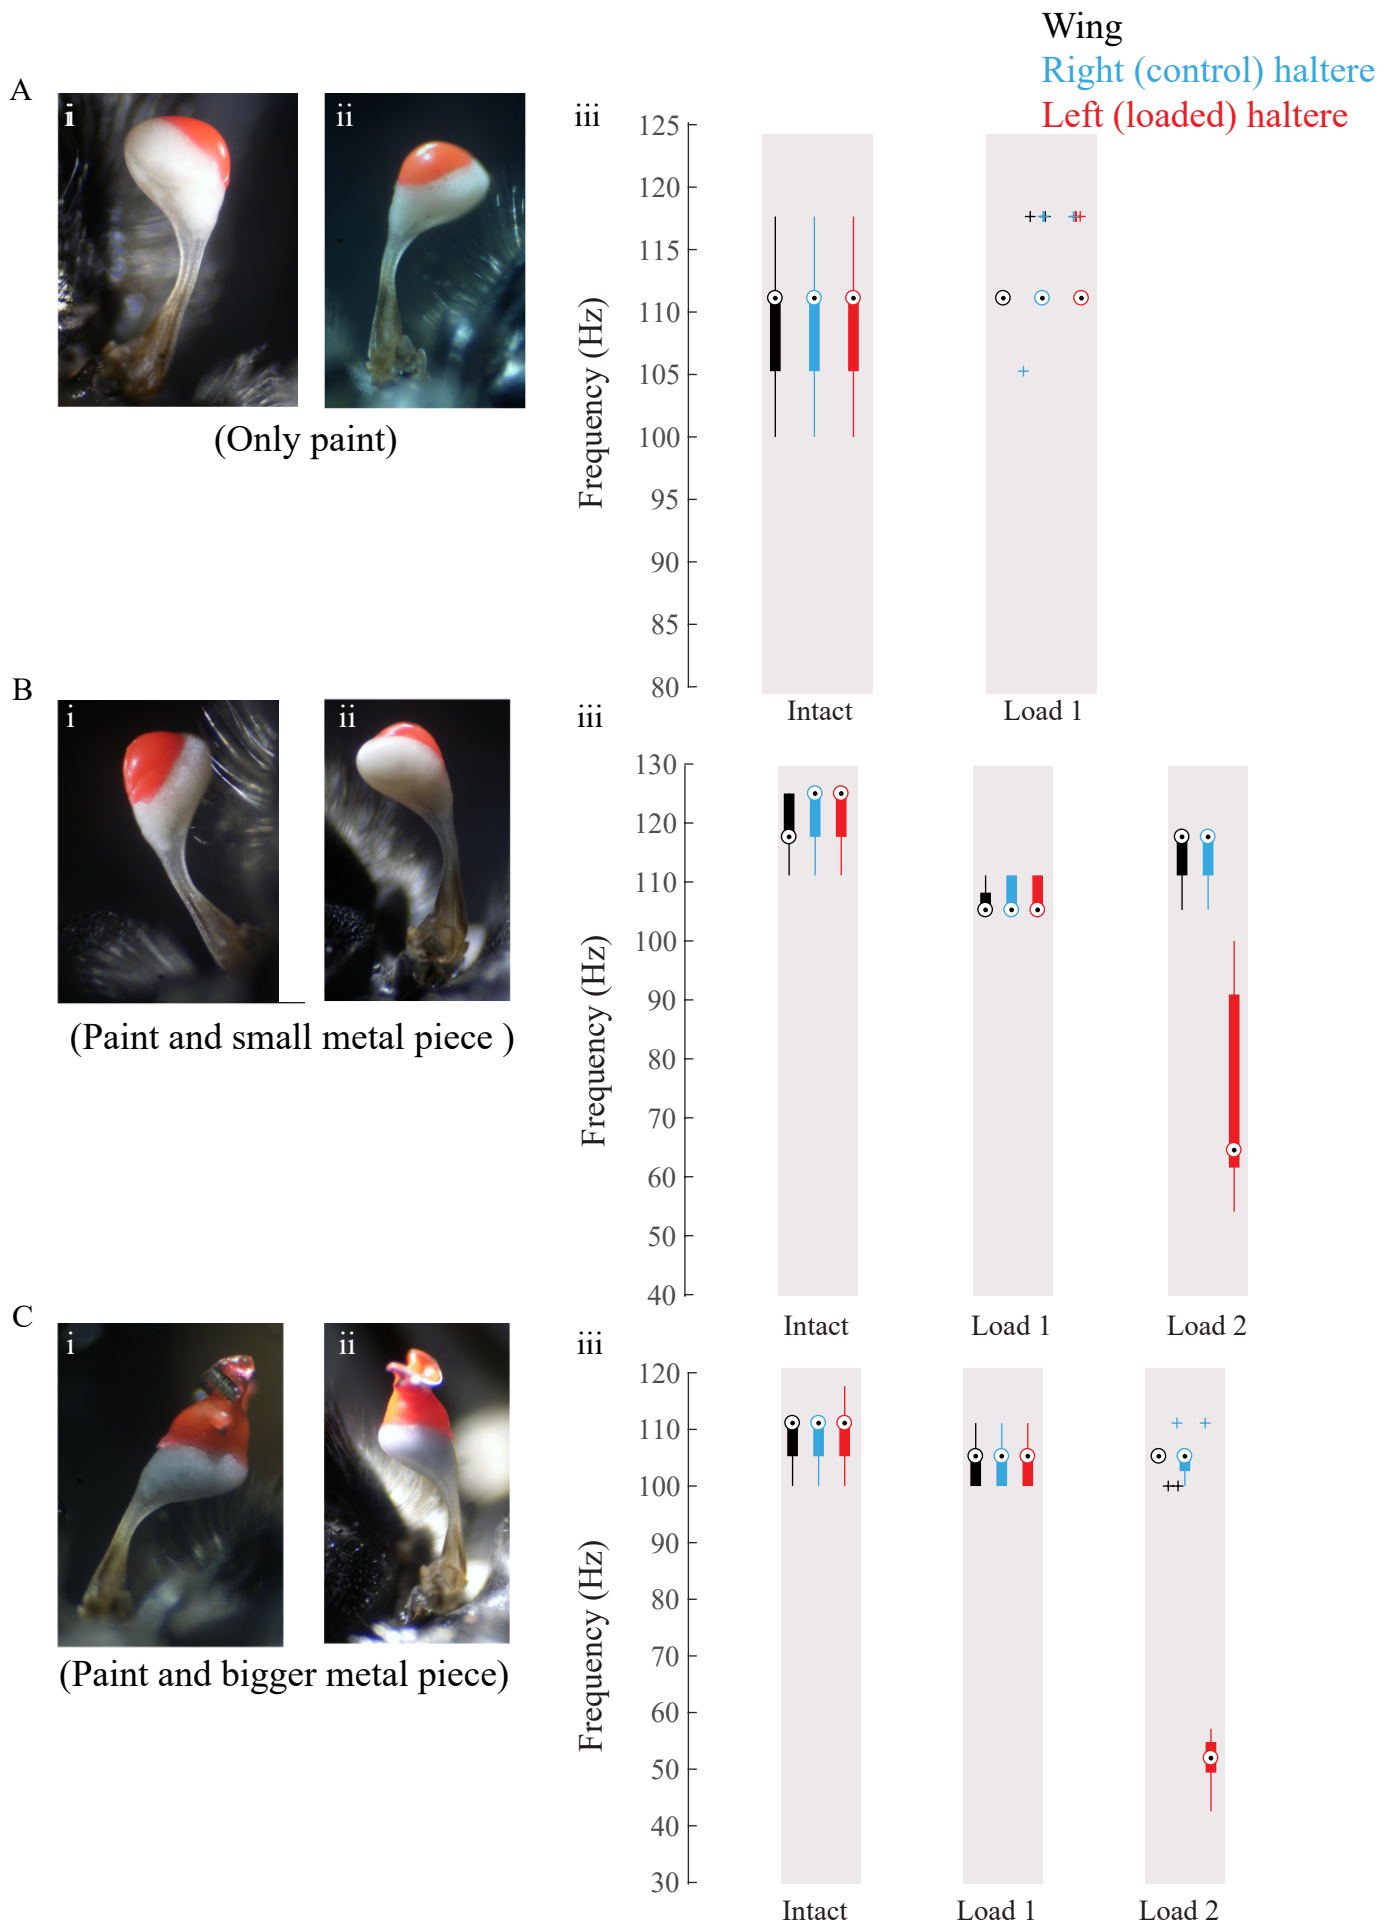

Supplement: supp [file elife-53824-supp-v1.zip]

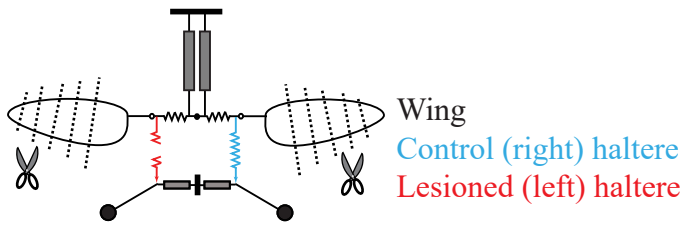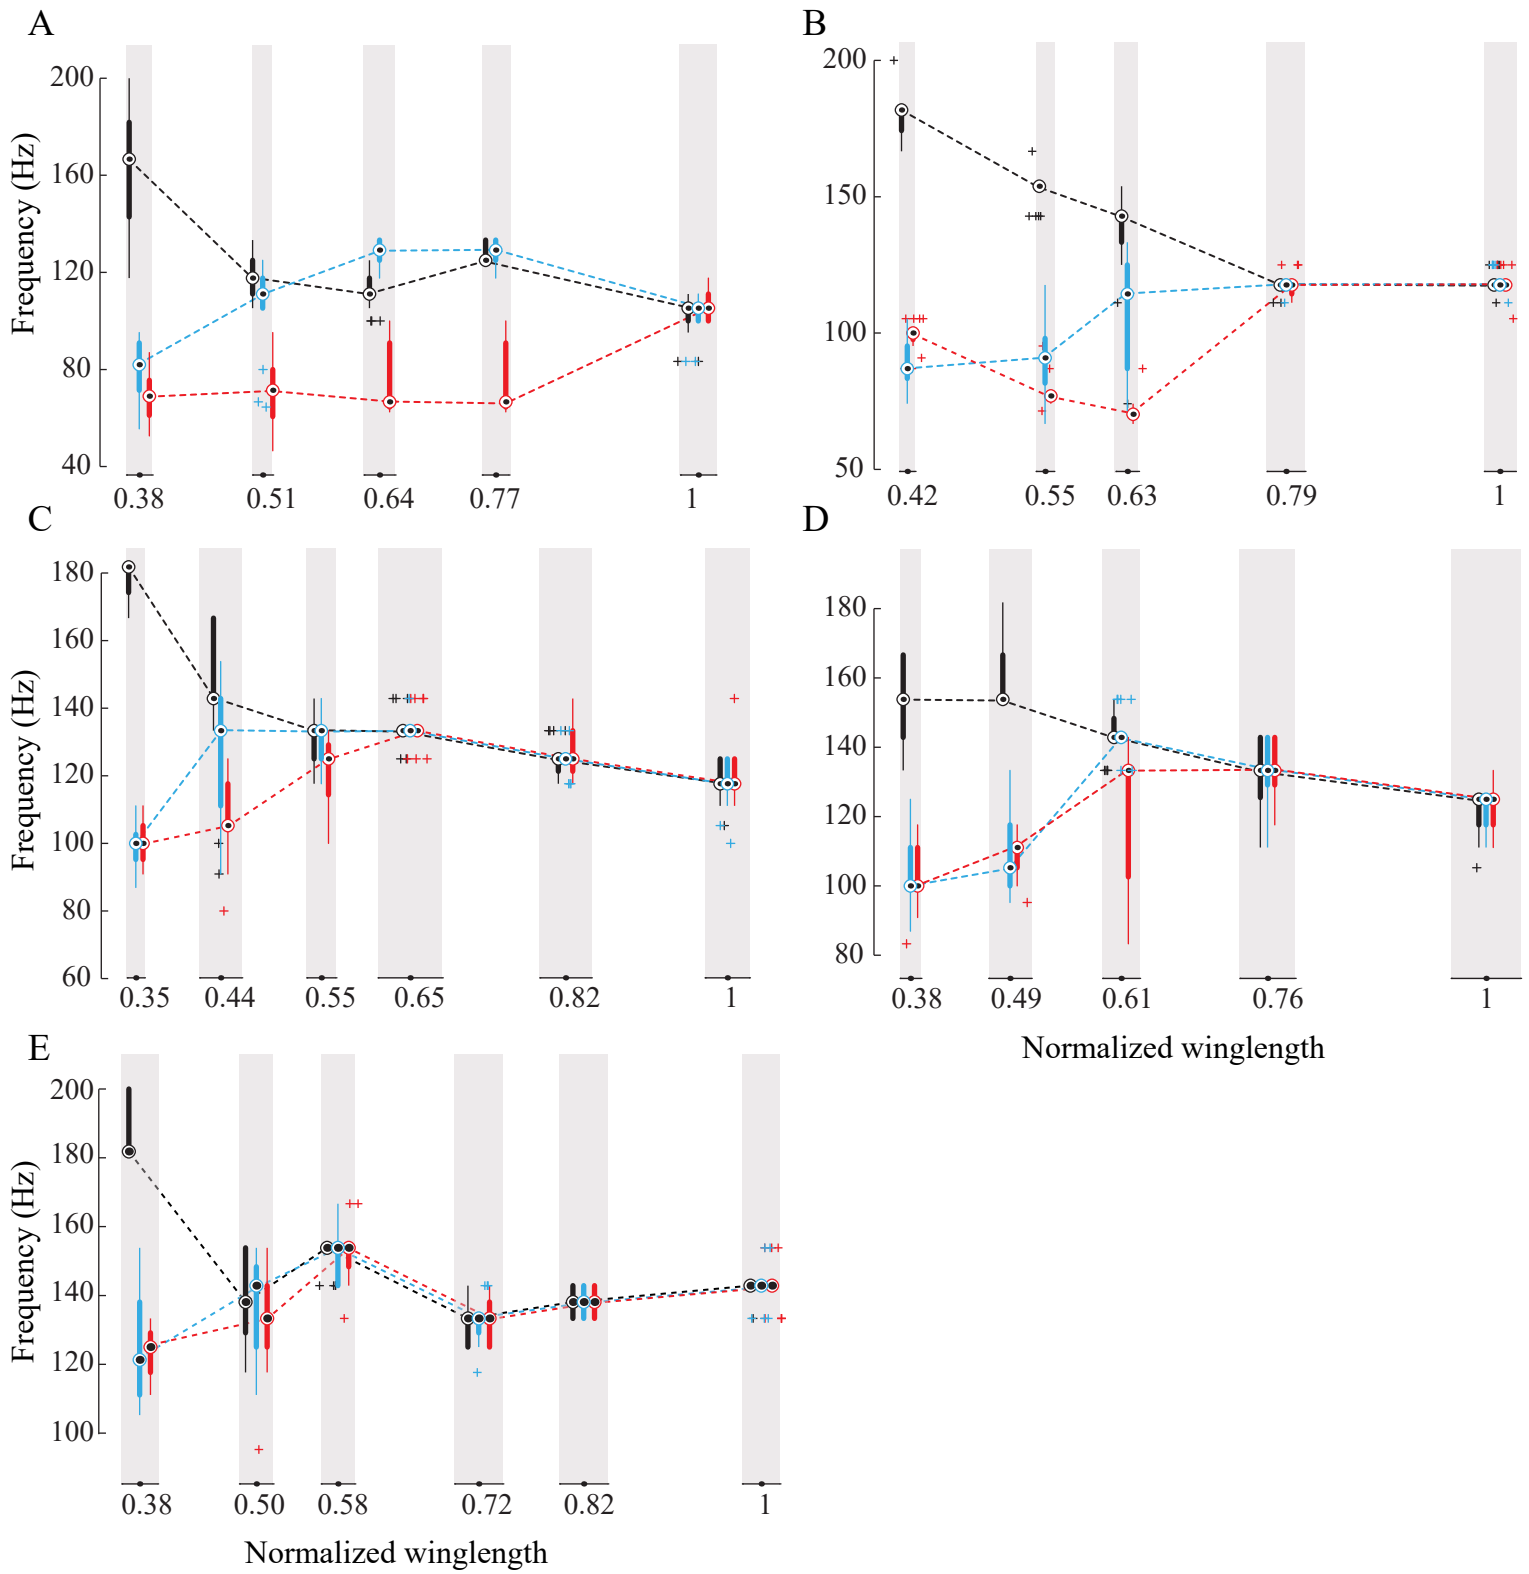

Supplement: supp [file elife-53824-supp-v1.zip]

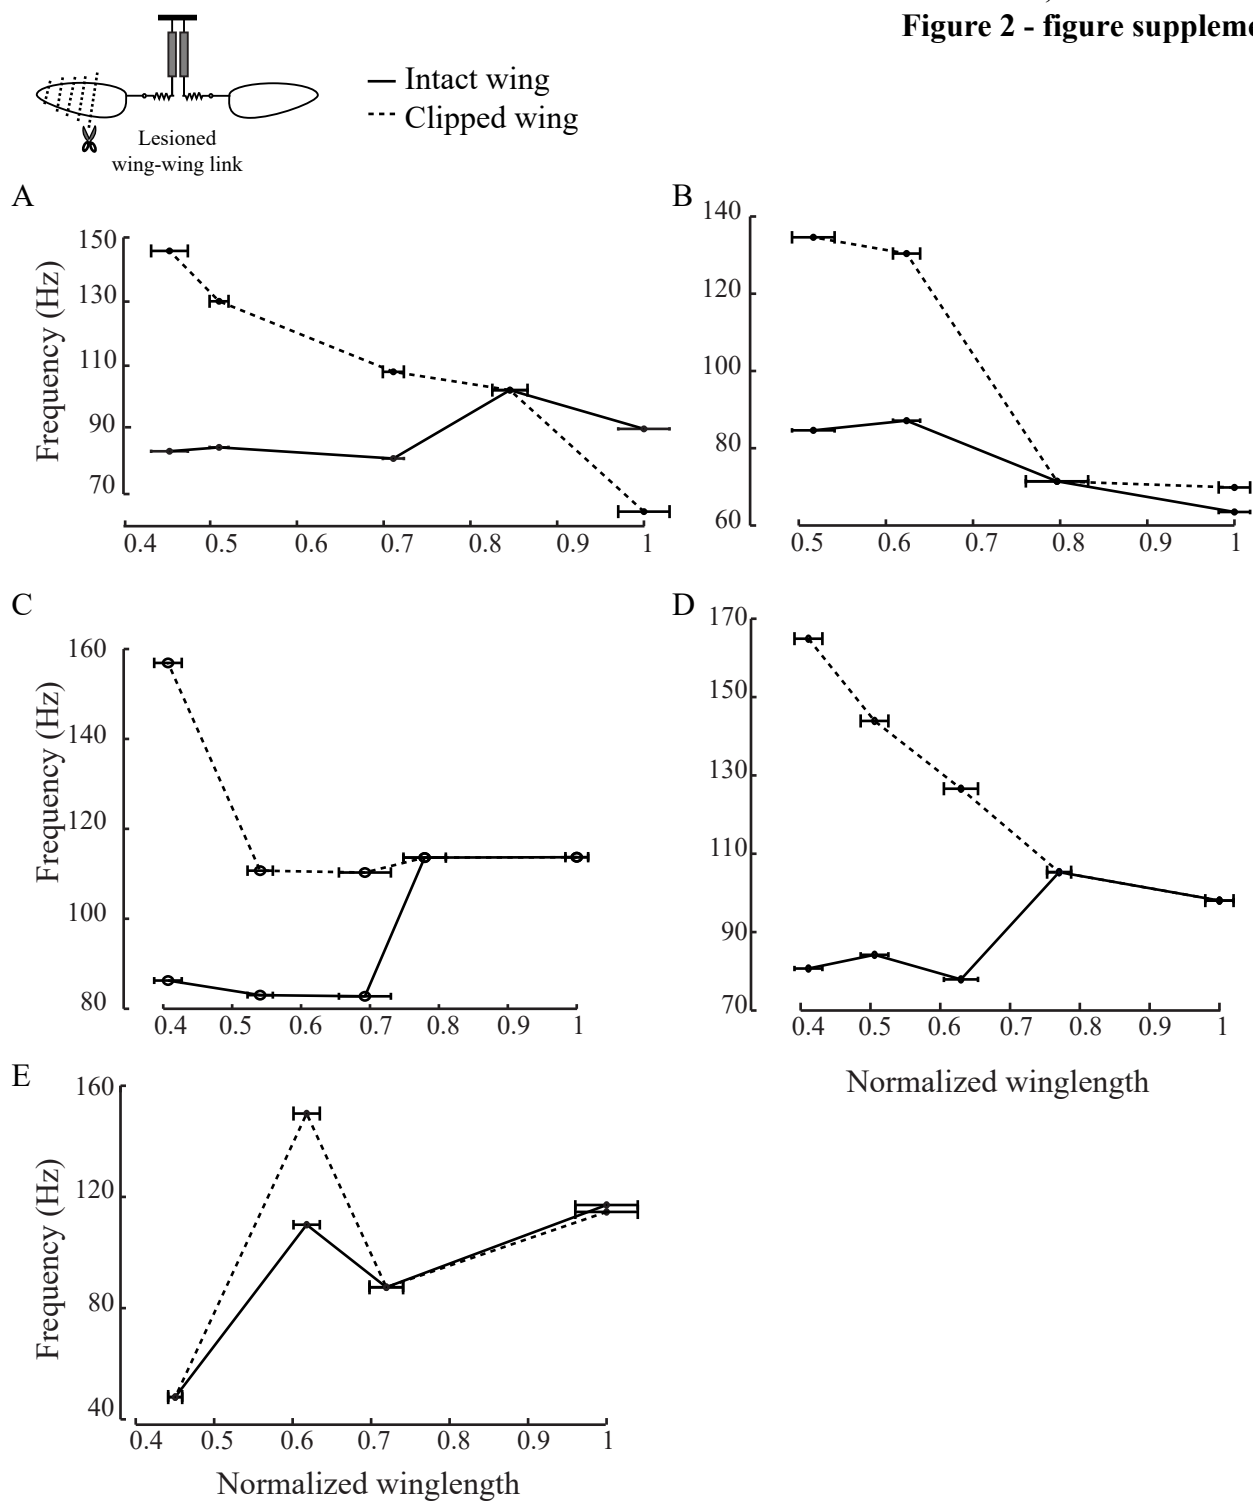

Supplement: supp [file elife-53824-supp-v1.zip]
